# Supplementary material for: Impact of Neck Dissection in Head and Neck Squamous Cell Carcinomas of Unknown Primary
Source: MDPI journal article supplement (doi:10.3390/cancers13102416), 2021-05-17
Supplement: s1 [file s1]

**Supplementary Table 1:** Characteristics of irradiation and other antineoplastic treatments.

|                                                         | All patients<br>N=322 | No ND<br>N=53    | Adenectomy<br>N=33 | Selective ND<br>N=116 | Modified radical/<br>radical ND<br>N=120 | p-value |
|---------------------------------------------------------|-----------------------|------------------|--------------------|-----------------------|------------------------------------------|---------|
| <b>Radiotherapy</b>                                     |                       |                  |                    |                       |                                          |         |
| <b>Nodal irradiation</b>                                | <b>322(100%)</b>      | <b>53(100%)</b>  | <b>33(100%)</b>    | <b>116 (100%)</b>     | <b>120 (100%)</b>                        | -       |
| Laterality of radiotherapy (N=287) <sup>a</sup>         |                       |                  |                    |                       |                                          | <.001   |
| Unilateral                                              | 55(19.2%)             | 10(21.3%)        | 14(46.7%)          | 17(16.2%)             | 14(13.3%)                                |         |
| Bilateral                                               | 232(80.8%)            | 37(78.7%)        | 16(53.3%)          | 88(83.8%)             | 91(86.7%)                                |         |
| Duration of radiotherapy (days)                         | 49;48+/-11            | 53 ;53+/-8       | 49 ;               | 49+/-13               | 47;46+/-10.5                             | <.001   |
| Dose (Gray Gy)                                          | 66;64+/-7             | 70 ;68+/-6       | 66 ;66+/-7         | 66;63+/-7.5           | 66;63+/-6                                | <.001   |
| Interval of >10 weeks between diagnosis and irradiation | 168 (52.2%)           | 35(66.0%)        | 14(42.4%)          | 61 (52.6%)            | 58 (48.3%)                               | 0.109   |
| <b>Mucosal irradiation</b>                              | <b>281(87.8%)</b>     | <b>47(90.4%)</b> | <b>27(81.2%)</b>   | <b>103 (88.8%)</b>    | <b>104 (87.4%)</b>                       | 0.670   |
| Nasopharynx                                             | 209 (67.4%)           | 30(60.0%)        | 23(76.7%)          | 75 (66.4%)            | 81 (69.2%)                               | 0.448   |
| Oropharynx                                              | 271 (85.2%)           | 44(86.3%)        | 26(81.2%)          | 100 (86.2%)           | 101 (84.9%)                              | 0.909   |
| Hypopharynx                                             | 243 (76.9%)           | 40(78.4%)        | 24(75.0%)          | 84 (73.7%)            | 95 (79.8%)                               | 0.712   |
| Larynx                                                  | 207 (65.9%)           | 35(68.6%)        | 14(43.7%)          | 70 (62%)              | 88 (74.6%)                               | 0.008   |
| Oral cavity                                             | 72 (23.8%)            | 15(31.2%)        | 5(16.7%)           | 33 (30%)              | 19 (16.5%)                               | 0.046   |
| Interruption ≥ 4 days                                   | 21 (6.5%)             | 4(7.5%)          | 3(9.1%)            | 6 (5.2%)              | 8 (6.7%)                                 | 0.856   |
| <b>Chemotherapy</b>                                     | <b>210 (65.4%)</b>    | <b>46(86.8%)</b> | <b>26(78.8%)</b>   | <b>65 (56.0%)</b>     | <b>73 (61.3%)</b>                        | <.001   |
| Neoadjuvant                                             | 33 (10.3%)            | 24(45.3%)        | 3(9.1%)            | 3 (2.6%)              | 3 (2.5%)                                 | <.001   |
| Concomitant                                             | 201 (62.6%)           | 42(79.2%)        | 25(76.8%)          | 64 (55.2%)            | 70 (58.8%)                               | 0.007   |

35 patients for whom laterality of radiotherapy was missing.

Results presented as frequency and percentage (n%) or by median; mean +/- standard deviation.

**Supplementary Table 2:** Impact of neck dissection on grade III-IV acute and late toxicities in the subgroup of the 232 patients with bilateral nodal irradiation.

|                           | No ND     | Lymphadenectomy | Selective ND | Modified radical ND | Radical ND | p-value |
|---------------------------|-----------|-----------------|--------------|---------------------|------------|---------|
| <b>Acute toxicities</b>   |           |                 |              |                     |            |         |
| <i>Number of patients</i> | 37        | 16              | 88           | 78                  | 13         |         |
| Dysphagia                 | 15(40.5%) | 3(18.7%)        | 29(32.9%)    | 19(24.4%)           | 7 (53.8%)  | 0.111   |
| Pain                      | 8(21.6%)  | 1(6.2%)         | 13(14.9%)    | 14(17.9%)           | 5(38.5%)   | 0.190   |
| <b>Late toxicities</b>    |           |                 |              |                     |            |         |
| <i>Number of patients</i> | 37        | 15              | 88           | 74                  | 13         |         |
| Dysphagia                 | 5(13.5%)  | 0               | 6 (6.8%)     | 5 (6.8%)            | 6 (46.1%)  | 0.002   |
| Fibrosis                  | 0         | 0               | 8(9.1%)      | 3(4.0%)             | 5(38.5%)   | 0.001   |
| Pain                      | 2(5.4%)   | 0               | 2 (2.3%)     | 1 (1.3%)            | 2 (15.4%)  | 0.109   |

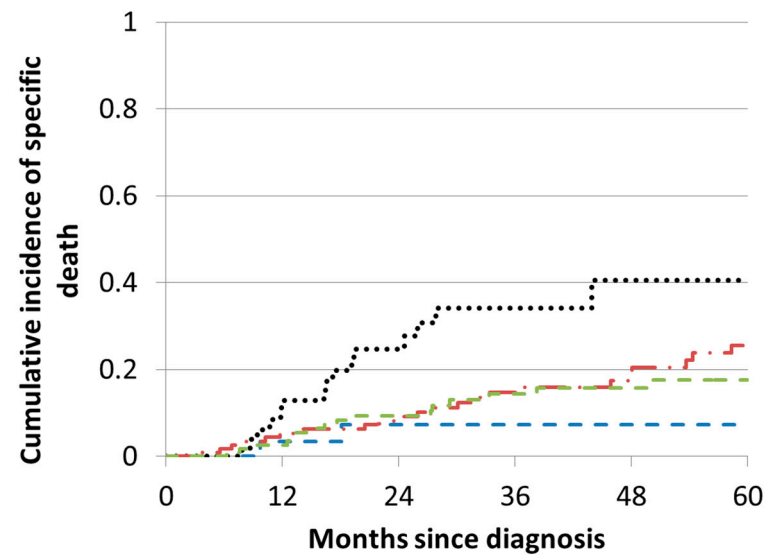

|                                   |     |     |    |    |    |    |
|-----------------------------------|-----|-----|----|----|----|----|
| ..... No ND                       | 53  | 38  | 23 | 12 | 7  | 3  |
| - - - Lymphadenectomy             | 33  | 29  | 23 | 17 | 12 | 8  |
| - . - Selective ND                | 116 | 104 | 86 | 61 | 49 | 39 |
| - - - Modified radical/radical ND | 120 | 102 | 90 | 67 | 50 | 34 |

**Supplementary Figure 1:** Incidence of HNCUP specific death according to extent of ND.
